# Supplementary material for: High contiguity Arabidopsis thaliana genome assembly with a single nanopore flow cell
Source: PubMed Central journal article supplement (PMC5803254; doi:10.1038/s41467-018-03016-2), 2018-02-07
Supplement: 41467_2018_3016_MOESM1_ESM.pdf [file 41467_2018_3016_MOESM1_ESM.pdf]

## Supplementary Note

### Pacific Biosciences genome sequencing and assembly

20 g young leaf material were frozen in liquid nitrogen and ground to fine powder using mortar and pestle. The powder was directly transferred into lysis buffer and DNA was extracted with a Qiagen genomic DNA extraction kit (Qiagen, Hamburg, Germany) in combination with Qiagen genomic tip columns (500/G; Qiagen, Hamburg, Germany) according to the manufacturer's protocol. DNA quality and quantity was determined with a NanoDrop ND 1000 spectrometer (PeqLab, Erlangen, Germany), a Qubit 2.0 Fluorometer (Thermo Fisher Scientific, Waltham, USA) and by pulse field gel electrophoresis. A total of 10 µg genomic DNA was sheared to a target fragment size of 50 kb using a Megaruptor™ 2 device (Diagenode, Denville, USA). A 30 kb template library was prepared using the BluePippin™ size-selection system according to the manufacturer's protocol (P/N 101-024-600-02, Pacific Biosciences, California, USA). The final library was sequenced on a Pacific Biosciences Sequel instrument following the Magbead loading protocol. A single SMRT cell resulted in 7.08 Gb of raw sequencing data (Supplementary Fig. 1). Raw reads were assembled with Falcon (commit b22b63d, <https://github.com/fbemm/onefc-oneasm/falcon.config>) and polished with arrow (version 2.2.1, default parameters, PBfal Round 1) as well as pilon (version 1.22, default parameters, PBfal Round 4). The final assembly had a total length of 119 Mb (N50: 11 Mb) spread across 78 contigs (Table 1). Comparisons to optical maps determined the PBfal assemblies to be free of chimeric misjoins, and to harbor one artificial expanded (7,878 bp) and four collapsed (8.5 - 73 kb) assembly regions.

## Supplementary Figures

**Supplemental Fig. 1. Comparison of read length and GC content of (A) the Oxford Nanopore (ONT) and (B) PacBio (PB) Sequel raw reads.** Lower and upper hinges correspond to the 25<sup>th</sup> and the 75<sup>th</sup> percentile. Whiskers are extended 1.5 \* IQR (IQR is the interquartile range between the 25<sup>th</sup> and the 75<sup>th</sup> percentile) from the smallest and highest hinge.

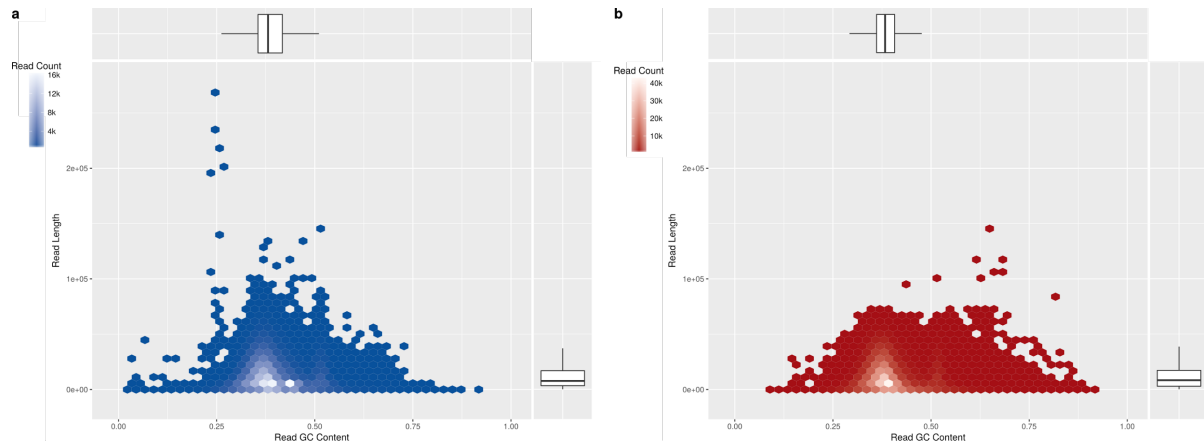

**Supplemental Fig. 2. Structural variants between TAIR10 (Col-0) and assembled genomes.** (A) ONTmin (Round 4) compared against TAIR10 (Col-0). (B) PBfal (Round 4) compared against TAIR10 (Col-0). Assembly types: Oxford, ONT; PacBio Sequel, PB; Miniasm, min; Falcon, fal. Polishing rounds PBfal: 0 = raw assembly; 1, arrow 1x; 4, pilon 1x.

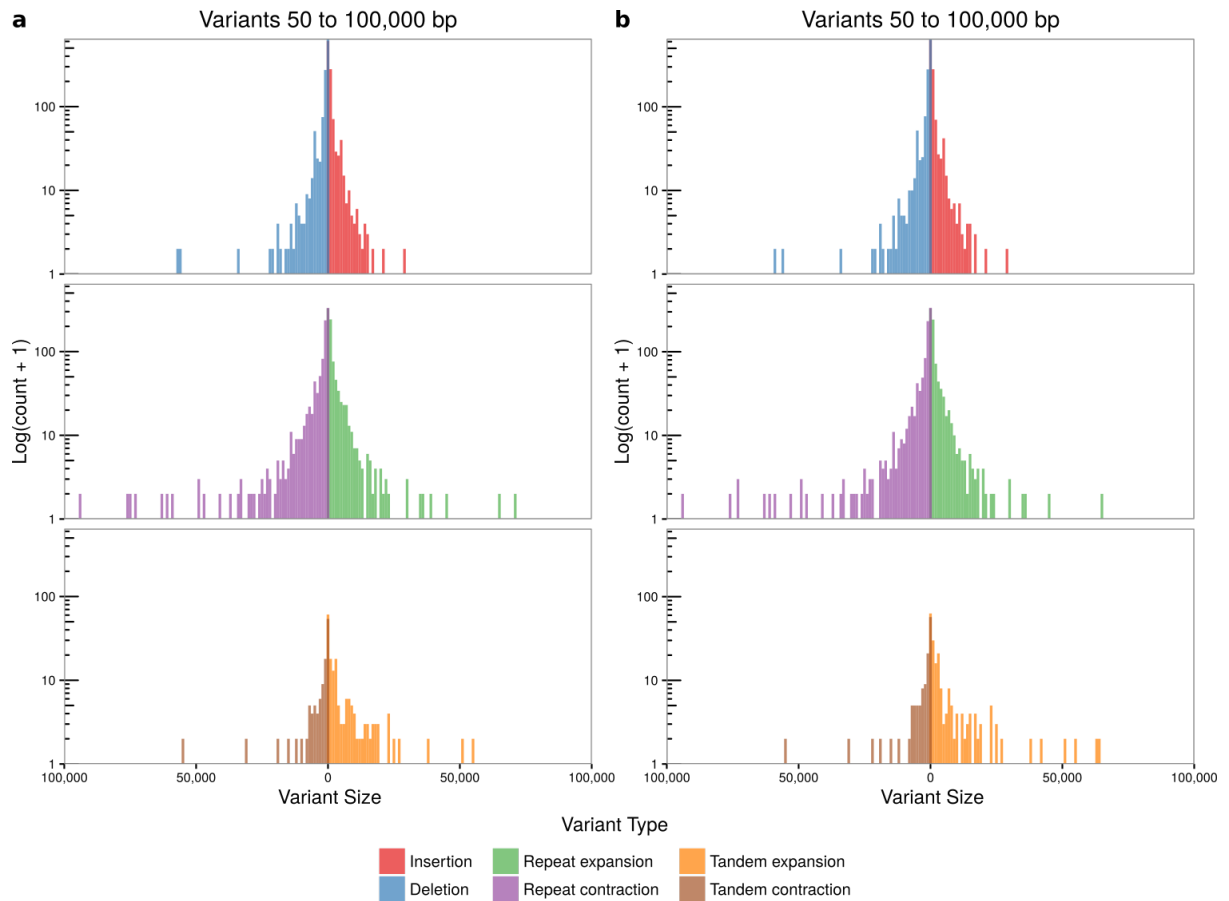

**Supplemental Fig. 3. Comparison of heterozygous SNPs in the Oxford Nanopore (ONT), the PacBio (PB) and the TAIR10 reference assembly.** Assembly types: Canu, can; Miniasm, min; Falcon, fal; reference genome, TAIR10. Polishing rounds ONTcan and ONTmin: 0 = raw assembly; 1, racon 1x; 2, racon 2x; 3, racon 3x; 4, pilon 1x. Polishing rounds PBfal: 0 = raw assembly; 1, arrow 1x; 4, pilon 1x.

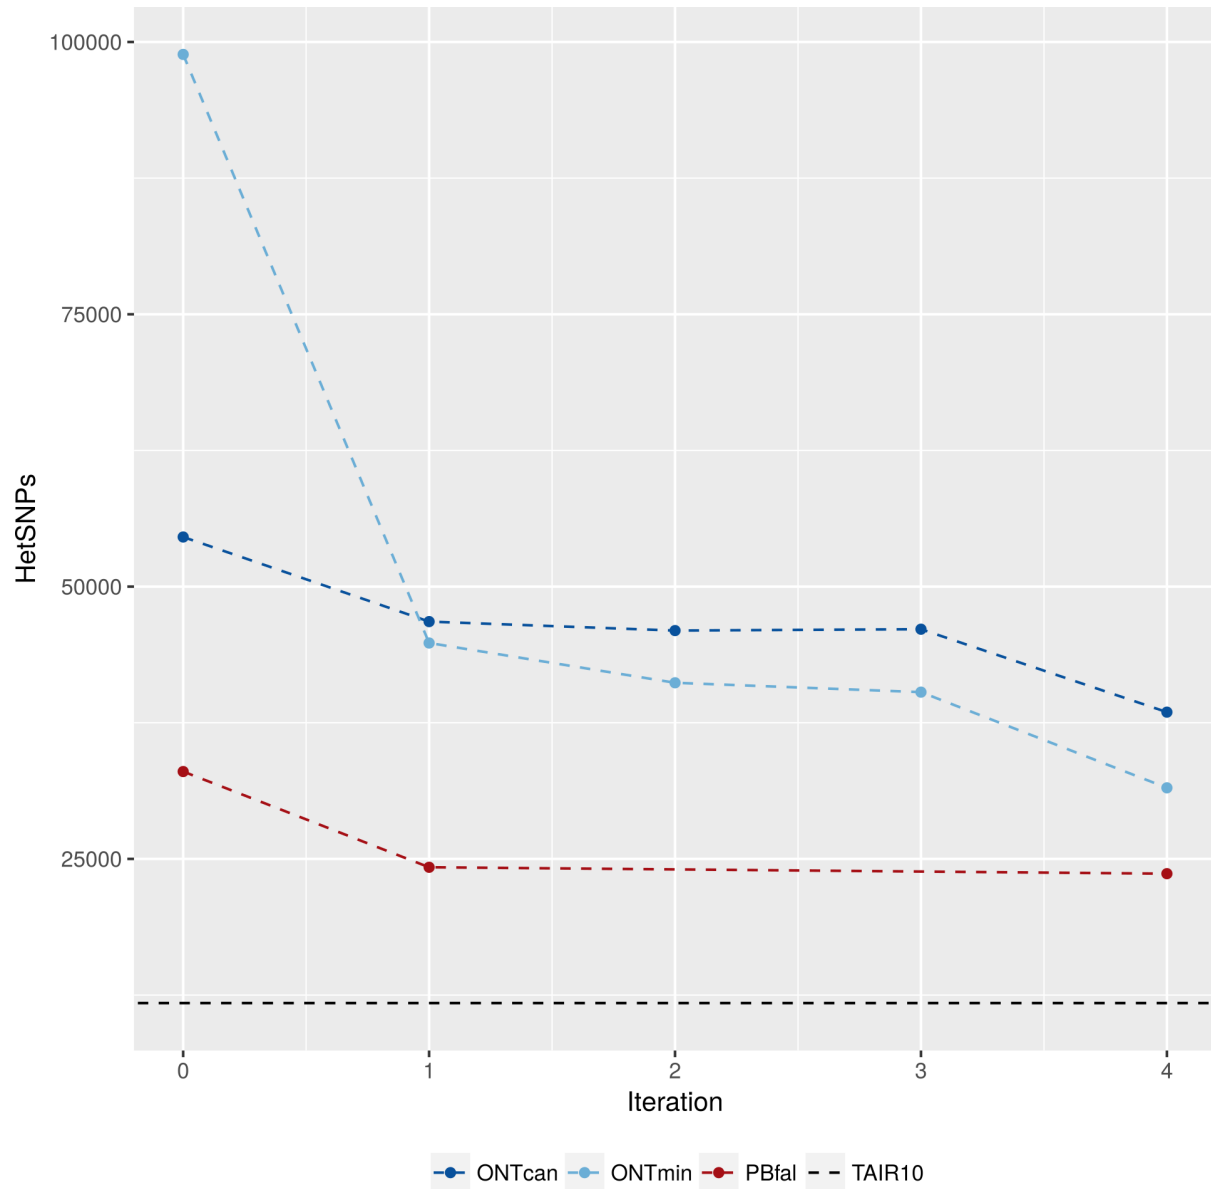

# Supplemental Tables

## Supplemental Table 1. Bionano Genomics (BNG) Irys mapping statistics to analyze genome assembly integrity. Assembly types: Canu, can; Miniasm, min; Falcon, fal.

Polishing rounds ONTcan and ONTmin: 0 = raw assembly; 1, racon 1x; 2, racon 2x; 3, racon 3x; 4, pilon 1x. Polishing rounds PBfal: 0 = raw assembly; 1, arrow 1x; 4, pilon 1x. FP, false positive; FN false negative; # number; Expansion (Exp.) artificial expansion/duplication; Contraction (Con.), artificial contraction/deletion; Cmap, Bionano optical assembled map;

| Name   | Round (#) | FP Rate (/100kb) | FN Rate (/100kb) | Exp. (#) | Exp. (bp) | Con. (#) | Con. (bp) | Cmap (#) | Contigs covered (#) | Contigs covered (bp) |
|--------|-----------|------------------|------------------|----------|-----------|----------|-----------|----------|---------------------|----------------------|
| ONTcan | 0         | 0.33             | 0.12             | 4        | 108,649   | 4        | 256,855   | 139      | 37                  | 107,211,166          |
| ONTcan | 1         | 0.15             | 0.08             | 0        | 0         | 5        | 221,206   | 175      | 53                  | 113,172,892          |
| ONTcan | 2         | 0.13             | 0.07             | 0        | 0         | 4        | 128,339   | 194      | 54                  | 113,378,731          |
| ONTcan | 3         | 0.13             | 0.07             | 0        | 0         | 4        | 213,646   | 164      | 53                  | 113,297,084          |
| ONTcan | 4         | 0.01             | 0.04             | 0        | 0         | 4        | 128,258   | 167      | 57                  | 115,815,769          |
| ONTmin | 0         | -                | -                | -        | -         | -        | -         | 1        | 1                   | -                    |
| ONTmin | 1         | 0.33             | 0.08             | 1        | 17,592    | 5        | 176,008   | 143      | 30                  | 115,869,843          |
| ONTmin | 2         | 0.22             | 0.07             | 1        | 17,724    | 6        | 227,865   | 143      | 31                  | 116,269,738          |
| ONTmin | 3         | 0.22             | 0.07             | 1        | 17,735    | 5        | 200,697   | 143      | 31                  | 116,332,567          |
| ONTmin | 4         | 0.02             | 0.04             | 3        | 32,369    | 6        | 244,011   | 143      | 31                  | 118,386,082          |
| PBfal  | 0         | 0.05             | 0.32             | 1        | 7,465     | 4        | 136,303   | 143      | 41                  | 118,317,899          |
| PBfal  | 1         | 0.01             | 0.04             | 1        | 7,867     | 4        | 135,647   | 144      | 41                  | 118,721,706          |
| PBfal  | 4         | 0.01             | 0.04             | 1        | 7,878     | 4        | 135,696   | 144      | 41                  | 118,721,706          |

**Supplemental Table 2. Gene completeness statistics for all assemblies according to QAST metrics.** Assembly types: Canu, can; Miniasm, min; Falcon, fal. Polishing rounds ONTcan and ONTmin: 0 = raw assembly; 1, racon 1x; 2, racon 2x; 3, racon 3x; 4, pilon 1x. Polishing rounds PBfal: 0 = raw assembly; 1, arrow 1x; 4, pilon 1x.

| <b>Name</b> | <b>Polishing Round (#)</b> | <b>Complete Genes (#)</b> | <b>Partial Genes (#)</b> | <b>Missing Genes (#)</b> |
|-------------|----------------------------|---------------------------|--------------------------|--------------------------|
| ONTcan      | 0                          | 25,127                    | 1,979                    | 6,235                    |
| ONTcan      | 1                          | 29,211                    | 1,572                    | 2,558                    |
| ONTcan      | 2                          | 29,376                    | 1,501                    | 2,464                    |
| ONTcan      | 3                          | 29,405                    | 1,498                    | 2,438                    |
| ONTcan      | 4                          | 30,036                    | 1,747                    | 1,558                    |
| ONTmin      | 0                          | 0                         | 2                        | 33,339                   |
| ONTmin      | 1                          | 29,037                    | 1,477                    | 2,827                    |
| ONTmin      | 2                          | 29,408                    | 1,496                    | 2,437                    |
| ONTmin      | 3                          | 29,459                    | 1,515                    | 2,367                    |
| ONTmin      | 4                          | 30,064                    | 1,738                    | 1,539                    |
| PBfal       | 0                          | 29,857                    | 1,672                    | 1,812                    |
| PBfal       | 1                          | 29,873                    | 1,734                    | 1,734                    |
| PBfal       | 4                          | 29,869                    | 1,746                    | 1,726                    |

**Supplemental Table 3. Structural variants between TAIR10 (Col-0) and assembled genomes.** Assembly types: Oxford, ONT; PacBio Sequel, PB; Miniasm, min; Falcon, fal. Polishing rounds PBfal: 0 = raw assembly; 1, arrow 1x; 4, pilon 1x.

| Type                | ONTmin_IT4<br>(#) | ONTmin_IT4<br>(bp) | PBfal_IT4<br>(#) | PBfal_IT4<br>(bp) |
|---------------------|-------------------|--------------------|------------------|-------------------|
| Insertions          | 1,101             | 1,345,360          | 1,121            | 1,379,584         |
| Deletions           | 1,144             | 1,617,994          | 1,165            | 1,699,713         |
| Tandem Expansions   | 153               | 765,310            | 181              | 1,020,786         |
| Tandem Contractions | 104               | 282,829            | 114              | 313,104           |
| Repeat Expansions   | 858               | 2,210,542          | 848              | 2,053,061         |
| Repeat Contractions | 920               | 3,293,154          | 912              | 3,255,662         |
